# Supplementary material for: Ancient Dispersal of the Human Fungal Pathogen Cryptococcus gattii from the Amazon Rainforest
Source: PLoS One. 2013 Aug 7;8(8):e71148. doi: 10.1371/journal.pone.0071148 (PMC3737135; doi:10.1371/journal.pone.0071148)
Supplement: Table S3 — List of strains and background information. (XLSX) [file pone.0071148.s009.xlsx]

## Sheet: Strains and data SCAR-MLST
Strain#	Other strainnumbers	Culture Collection	Species	Origin	Population	Source	Type	Publication	Serotype	AFLP	Mating-type	Mø IPR value	Mice virulence	Initial SCAR-MLST setup	Flow cytometry	SCAR-MLST Fragment 15	SCAR-MLST Fragment 32	SCAR-MLST Fragment 34	SCAR-MLST Fragment 54	SCAR-MLST IGS	ST nuclear loci	Coalescence Haplotype	CNB2-16	CNB2-17	CNB2-18	CNB2-22	CNB2-23	CNB2-24	CNB3-12	CNB6-4	CNB6-5	CNB6-6	STR-type	AFLP Marker = AC/G01	AFLP Marker = AC/G02	AFLP Marker = AC/G03	AFLP Marker = AC/G04	AFLP Marker = AC/G06	AFLP Marker = AC/G07	AFLP Marker = AC/G11	AFLP Marker = AC/G13	AFLP Marker = AC/G14	AFLP Marker = AC/G16	AFLP Marker = AC/G17	AFLP Marker = AC/C01	AFLP Marker = AC/C02	AFLP Marker = AC/C03	AFLP Marker = AC/C05	AFLP Marker = AC/C06
113A-5	JH3117	CBS, MMRL	Cryptococcus gattii	Rathrevor Beach, Parkville, British Columbia, Canada	North America	Air sample, stage 5, from beneath Douglas Fir tree #129	Environmental	Kidd et al. Proc Natl Acad Science USA 2004;101:17258-17263	B	6A	alpha					1	1	1	1	1	1	H01	16	16	15	15	14	14	20	26	17	22	52	1	1	1	1	1	0	1	1	0	0	0	0	1	1	0	1
152A-6	JH3124, KB152A-6	CBS, MMRL	Cryptococcus gattii	Rathrevor Beach, Parkville, British Columbia, Canada	North America	air sample, stage 6, from beneath Alder tree #152	Environmental	Kidd et al. Proc Natl Acad Science USA 2004;101:17258-17263	B	6B	alpha					2	2	2	2	2	4	H03	14	9.1	9	14	9.1	14	10	8	35	4	24	1	1	0	1	1	0	1	1	0	0	0	0	1	1	1	1
99MR10	JH3068	CBS, MMRL	Cryptococcus gattii	Vancouver, British Columbia, Canada	North America	immunocompetent male, CSF	Clinical	Kidd et al. Proc Natl Acad Science USA 2004;101:17258-17263	B	6A	alpha					1	1	1	1	1	1	H01	16	16	15	15	14	14	19	25	15	20	50	1	1	1	1	1	0	1	1	0	0	0	0	1	1	0	1
A1M-F2596	CDC-F2596, JH3059, WM02.203	CBS, MMRL	Cryptococcus gattii	Nanaimo, British Columbia, Canada	North America	Pet dog, lump on head	Veterinary	Kidd et al. Proc Natl Acad Science USA 2004;101:17258-17263	B	6A	alpha			Yes		1	1	1	1	1	1	H01	16	16	15	15	14	14	19	25	15	20	50	1	1	1	1	1	0	1	1	0	0	0	0	1	1	0	1
A1M-F2866	CDC-F2866, JH3060, CBS11240, WM02.205	CBS, MMRL	Cryptococcus gattii	Shores of an island close to Vancouver Island	North America	Dead wild Dall's porpoise lumph node autopsy	Veterinary	Kidd et al. Proc Natl Acad Science USA 2004;101:17258-17263	B	6A	alpha					1	1	1	1	1	1	H01	16	16	15	15	14	14	19	26	15	20	51	1	1	1	1	1	0	1	1	0	0	0	0	1	1	0	1
A1M-F2932	CDC-F2932, JH3062, CBS11235, WM02.206	CBS, MMRL	Cryptococcus gattii	Kelowna, British Columbia, Canada	North America	immunocompetent male, lung	Clinical	Kidd et al. Proc Natl Acad Science USA 2004;101:17258-17263	B	6A	alpha					1	1	1	1	1	1	H01	16	16	15	15	14	14	19	25	15	20	50	1	1	1	1	1	0	1	1	0	0	0	0	1	1	0	1
A1M-F3016	CDC-F3016, JH3063, CBS11243, WM02.207	CBS, MMRL	Cryptococcus gattii	Shores of an island close to Vancouver Island	North America	Dead wild Dall's porpoise mediastinal lymph node	Veterinary	Kidd et al. Proc Natl Acad Science USA 2004;101:17258-17263	B	6A	alpha	1.47	6.8			1	1	1	1	1	1	H01	16	16	15	15	14	14	19	25	15	20	50	1	1	1	1	1	0	1	1	0	0	0	0	1	1	0	1
A1M-R265	CDC-R265, JH3030, MYA-4093, MYA-4138, CBS10514, WM02.32	CBS, MMRL	Cryptococcus gattii	Ducan, British Columbia, Canada	North America	immunocompetent male, bronchial wash	Clinical	Kidd et al. Proc Natl Acad Science USA 2004;101:17258-17263	B	6A	alpha	1.74	4.3	Yes	Haploid	1	1	1	1	1	1	H01	16	16	15	15	14	14	19	25	15	20	50	1	1	1	1	1	0	1	1	0	0	0	0	1	1	0	1
A1M-R265/25		CBS	Cryptococcus gattii	Ducan, British Columbia, Canada	North America	immunocompetent male, bronchial wash	Clinical	Kidd et al. Proc Natl Acad Science USA 2004;101:17258-17263	B	6A	alpha					1	1	1	1	1	1	H01	16	16	15	15	14	14	19	25	15	20	50	1	1	1	1	1	0	1	1	0	0	0	0	1	1	0	1
A1M-R268	CDC-R268, JH3033, WM02.35	CBS, MMRL	Cryptococcus gattii	Lantzville, British Columbia, Canada	North America	immunocompetent female, CSF	Clinical	Kidd et al. Proc Natl Acad Science USA 2004;101:17258-17263	B	6A	alpha					1	1	1	1	1	1	H01	16	16	15	15	14	14	19	25	15	20	50	1	1	1	1	1	0	1	1	0	0	0	0	1	1	0	1
A1M-R269	CDC-R269, JH3034, CBS11236, WM02.36	CBS, MMRL	Cryptococcus gattii	Victoria, British Columbia, Canada	North America	immunocompetent female, bronchial wash	Clinical	Kidd et al. Proc Natl Acad Science USA 2004;101:17258-17263	B	6A	alpha					1	1	1	1	1	1	H01	16	16	15	15	14	14	19	25	15	20	50	1	1	1	1	1	0	1	1	0	0	0	0	1	1	0	1
A1M-R271	CDC-R271, JH3036, CBS11237, WM02.38	CBS, MMRL	Cryptococcus gattii	Nanoose Bay, British Columbia, Canada	North America	immunocompetent male, bronchial alveolar lavage	Clinical	Kidd et al. Proc Natl Acad Science USA 2004;101:17258-17263	B	6A	alpha				Haploid	1	1	1	1	1	1	H01	16	16	15	15	14	14	19	25	15	20	50	1	1	1	1	1	0	1	1	0	0	0	0	1	1	0	1
A1M-R272	CDC-R272, JH3037, MYA-4094, CBS10865,WM02.39	CBS, MMRL	Cryptococcus gattii	Ladysmith, British Columbia, Canada	North America	immunocompetent female, bronchial alveolar lavage	Clinical	Kidd et al. Proc Natl Acad Science USA 2004;101:17258-17263	B	6B	alpha	0.88	avirulent	Yes	Haploid	2	2	2	2	2	4	H03	14	9.1	9	14	9.1	14	10	8	35	4	24	1	1	0	1	1	0	1	1	0	0	0	0	1	1	1	1
A1M-R273	CDC-R273, JH3038, WM02.40	CBS, MMRL	Cryptococcus gattii	Victoria, British Columbia, Canada	North America	immunocompetent male, bronchial alveolar lavage	Clinical	Kidd et al. Proc Natl Acad Science USA 2004;101:17258-17263	B	6A	alpha				Haploid	1	1	1	1	1	1	H01	16	16	15	15	14	14	19	25	15	20	50	1	1	0	1	1	0	1	1	0	0	0	0	1	1	0	1
A1M-R322	CDC-R322, JH3041, WM02.43	CBS, MMRL	Cryptococcus gattii	Parkesville, British Columbia, Canada	North America	immunocompetent female, CSF	Clinical	Kidd et al. Proc Natl Acad Science USA 2004;101:17258-17263	B	6A	alpha				Haploid	1	1	1	1	1	1	H01	16	16	15	15	14	14	19	25	15	20	50	1	1	0	1	1	0	1	1	0	0	0	0	1	1	0	1
A1M-R360	CDC-R360, CBS11238, WM02.44	CBS, MMRL	Cryptococcus gattii	Victoria, British Columbia, Canada	North America	immunocompetent male, aspiration of left lower lung lobe	Clinical	Kidd et al. Proc Natl Acad Science USA 2004;101:17258-17263	B	6A	alpha				Haploid	1	1	1	1	1	1	H01	16	16	15	15	14	14	19	26	15	20	51	1	1	0	1	1	0	1	1	0	0	0	0	1	1	0	1
A1M-R406	CDC-R406, JH3046, CBS11239, WM02.48	CBS, MMRL	Cryptococcus gattii	Nanaimo, British Columbia, Canada	North America	immunocompetent female, CSF	Clinical	Kidd et al. Proc Natl Acad Science USA 2004;101:17258-17263	B	6A	alpha			Yes	Haploid	1	1	1	1	1	1	H01	16	16	15	15	14	14	20	26	15	23	53	1	1	0	1	1	0	1	1	0	0	0	0	1	1	0	1
A1M-R409	CDC-R409, WM02.49	CBS, MMRL	Cryptococcus gattii	Victoria, British Columbia, Canada	North America	immunocompetent female, CSF	Clinical	Kidd et al. Proc Natl Acad Science USA 2004;101:17258-17263	B	6A	alpha				Haploid	1	1	1	1	1	1	H01	16	16	15	15	14	14	19	25	15	20	50	1	1	0	1	1	0	1	1	0	0	0	0	1	1	0	1
A1M-R498	CDC-R498, JH3052, WM02.53	CBS, MMRL	Cryptococcus gattii	Victoria, British Columbia, Canada	North America	Pet cat, sinus tract swab	Veterinary	Kidd et al. Proc Natl Acad Science USA 2004;101:17258-17263	B	6A	alpha				Haploid	1	1	1	1	1	1	H01	16	16	15	15	14	14	19	25	15	20	50	1	1	0	1	1	0	1	1	0	0	0	0	1	1	0	1
A1M-R500	CDC-R500, WM02.54	CBS, MMRL	Cryptococcus gattii	Victoria, British Columbia, Canada	North America	Pet cat, sinus tract swab	Veterinary	Kidd et al. Proc Natl Acad Science USA 2004;101:17258-17263	B	6A	alpha				Haploid	1	1	1	1	1	1	H01	16	16	15	15	14	14	19	25	15	20	50	1	1	0	1	1	0	1	1	0	0	0	0	1	1	0	1
A6M-R038	CBS11545	CBS, MMRL	Cryptococcus gattii	Oregon, USA, human, 2006	North America	Human	Clinical	Byrnes et al. J Infect Dis 2009;199:1081-1086	B	6C	alpha					25	3	3	1	8	39	H03	16	10	9	10	8.1	17	11	6	27	9	71	1	1	0	1	1	0	1	1	0	0	0	0	1	1	1	1
ARN1	ARN001, JH3738, WM03.456	CBS, MMRL	Cryptococcus gattii	Arnhemland, Northern Territory, Australia	Australasia	Eucalyptus camaldulensis	Environmental	Chen et al. Clin Infect Dis 2000;31:499-508	B	6B	alpha					2	2	2	2	2	4	H03	14	9.1	9	14	9.1	14	10	8	35	4	24	1	1	0	1	1	0	1	1	0	0	0	0	1	1	1	1
AV54S	AV54 Slimy, AV54, CBS10089, WM05.76	CBS, MMRL	Cryptococcus gattii	Thessaloniki, Greece	Europe	Clinical, source unknown	Clinical	Viviani et al. FEMS Yeast Res 2006;6:614-619	B	6	alpha	0.44	13.9			3	5	11	6	3	8	H11	14	9	9	10	11.1	11	10	6	6	3	23	1	1	0	1	1	0	1	1	0	0	0	0	1	1	0	1
AV54W	AV54 White, AV54, CBS10088, WM05.75	CBS, MMRL	Cryptococcus gattii	Thessaloniki, Greece	Europe	Clinical, source unknown	Clinical	Viviani et al. FEMS Yeast Res 2006;6:614-619	B	6	alpha					3	2	11	6	3	7	H11	14	9	9	10	11.1	11	10	6	6	3	23	1	1	0	1	1	0	1	1	0	0	0	0	1	1	0	1
AV55	CBS10090	CBS, MMRL	Cryptococcus gattii	Athens, Greece	Europe	Clinical, source unknown	Clinical	Viviani et al. FEMS Yeast Res 2006;6:614-619	B	6	a	1.71	6.0	Yes	Haploid	26	10	12	2	4	41	H21	14	12	14	14	12.1	14	19	2	21	23	43	1	1	0	1	1	0	1	1	0	0	0	0	1	1	1	1
Bandiaga	Bandiaga 225, WM05.229, WM06.2	MMRL	Cryptococcus gattii	Maringrida, Northern Territory, Australia	Australasia	Isolated from lung-tissue of an Aboriginal (isolated 01-06-1985)	Clinical	Chen et al. Clin Infect Dis 2000;31:499-508	nd	6B	alpha					2	2	2	2	2	4	H03	14	9.1	9	14	9.1	14	10	8	35	4	24	1	1	0	1	1	0	1	1	0	0	0	0	1	1	1	1
CBS10601	HK703	CBS	Cryptococcus gattii	Hong Kong, China	Australasia	CSF from HIV- 40y male, isolated in 2003	Clinical	Lui et al. Q J Med 2006;99:143-151	B	6B	alpha					10	2	2	2	2	16	H03	14	9.1	9	14	9.1	14	10	8	36	4	28	1	1	0	1	1	0	1	1	0	0	0	0	1	1	1	1
CBS10602	HK1432	CBS	Cryptococcus gattii	Hong Kong, China	Australasia	CSF from HIV- 34y male, isolated in 1998	Clinical	Lui et al. Q J Med 2006;99:143-151	B	6	alpha					9	14	17	2	9	15	H23	13	7	11	12	11.1	13	11	8	5	10	19	1	1	0	1	1	0	1	1	0	0	0	0	1	1	1	1
CBS10603	HK1692	CBS	Cryptococcus gattii	Hong Kong, China	Australasia	CSF from HIV- 34y male, isolated in 1998	Clinical	Lui et al. Q J Med 2006;99:143-151	B	6	alpha					9	14	17	2	9	15	H23	13	7	11	12	11.1	13	11	8	5	10	19	1	1	0	1	1	0	1	1	0	0	0	0	1	1	1	1
CBS10604	HK4359	CBS	Cryptococcus gattii	Hong Kong, China	Australasia	CSF from HIV- 34y male, isolated in 1998	Clinical	Lui et al. Q J Med 2006;99:143-151	B	6	alpha					9	14	17	2	9	15	H23	13	7	11	12	11.1	13	11	8	5	10	19	1	1	0	1	1	0	1	1	0	0	0	0	1	1	1	1
CBS10605	HK5362	CBS	Cryptococcus gattii	Hong Kong, China	Australasia	CSF from HIV- 34y male, isolated in 1998	Clinical	Lui et al. Q J Med 2006;99:143-151	B	6	alpha					9	14	17	2	9	15	H23	13	7	11	12	11.1	13	11	8	5	10	19	1	1	0	1	1	0	1	1	0	0	0	0	1	1	1	1
CBS1930	RV71421	CBS	Cryptococcus gattii	Aruba, Netherlands Antilles	South America (Aruba)	sick goat	Veterinary	Boekhout et al. Int J Syst Bacteriol 1997;47: 432-442	B	6	a	1.14	avirulent	Yes		4	5	13	1	5	9	H19	15.1	11	9	10	9.1	8	10	6	8	22	37	1	1	0	1	1	0	1	1	0	0	0	0	1	1	1	1
CBS6956	ATCC32609, NIH444, JH818, WM02.81, IHEM4161, RV45979, WM181	CBS, MMRL	Cryptococcus gattii	Seattle, Washington, USA	North America	sputum, immunocompetent human	Clinical	Kwon-Chung, Mycologia 1976;135:3353-3362	B	6A	alpha			Yes	Haploid	1	1	1	1	1	1	H01	17	16	17	15	14	14	18	25	15	20	56	1	1	0	1	1	0	1	1	0	0	0	0	1	1	0	1
CBS6956B	CBS6956 Beige (original isolate ATCC32609, NIH444, JH818, WM02.81)	CBS	Cryptococcus gattii	Seattle, Washington, USA	North America	sputum, immunocompetent human	Clinical	Kwon-Chung, Mycologia 1976;135:3353-3362	B	6A	alpha	1.35	24.0			1	1	1	1	1	1	H01	17	16	16	15	14	14	18	25	15	20	48	1	1	0	1	1	0	1	1	0	0	0	0	1	1	0	1
CBS6956W	CBS6956 White (original isolate ATCC32609, NIH444, JH818, WM02.81)	CBS	Cryptococcus gattii	Seattle, Washington, USA	North America	sputum, immunocompetent human	Clinical	Kwon-Chung, Mycologia 1976;135:3353-3362	B	6A	alpha					1	1	1	1	1	1	H01	17	16	16	15	14	15	18	25	15	20	54	1	1	0	1	1	0	1	1	0	0	0	0	1	1	0	1
CBS7750	451-SF13.2, B-4534, WM02.137	CBS	Cryptococcus gattii	San Francisco, California, USA	North America	Eucalyptus camaldulensis bark debris, isolated in August 1990	Environmental	Pfeiffer & Ellis, J Infect Dis 1991;163: 929-930	B	6A	alpha	0.93	avirulent			1	1	1	1	1	1	H01	16	15	16	15	15	14	19	25	15	20	45	1	1	0	1	1	0	1	1	0	0	0	0	1	1	0	1
CBS8684	IMH 1658, LA43, NUAM176, WM04.191, WM06.8	CBS, MMRL	Cryptococcus gattii	Quebrada de los Cuervos, Uruguay	South America (Uruguay)	nest of Polybia occidentalis (communal wasp), isolated in 1989	Environmental	Gezuele et al. Rev Iberoam Micol 1993;10:5-6	B	6	alpha	0.90	avirulent			5	11	14	4	6	10	H16	12	6.1	8	10	9.1	10	10	8	5	18	17	1	1	0	1	1	0	1	1	0	0	0	1	0	0	1	1
CCA242		CBS	Cryptococcus gattii	Alicante, Spain	Europe		Clinical	This study	B	6B	alpha	1.12	10.0			6	1	8	2	6	11	H03	11	12	9	14	10.1	11	12	10	4	27.2	41	1	1	0	1	1	0	1	1	0	0	0	0	1	1	1	1
CG12022007 Slimy	CG12022007	CBS	Cryptococcus gattii	Brazil	South America (Brazil)		Environmental	This study	B	6	alpha					22	12	15	7	7	36	H29	13	7	9	9	11.1	11	11	7	11	14	18	1	1	0	1	1	0	1	1	0	0	0	1	0	0	1	1
CG12022007 White	CG12022007	CBS	Cryptococcus gattii	Brazil	South America (Brazil)		Environmental	This study	B	6	alpha					22	2	15	7	7	35	H29	13	7	9	9	11.1	11	11	7	11	14	18	1	1	0	1	1	0	1	1	0	0	0	1	0	0	1	1
E113	JH3067	CBS	Cryptococcus gattii	Rathrevor Beach, Parkville, British Columbia, Canada	North America	Douglas Fir tree #113	Environmental	Kidd et al. Proc Natl Acad Science USA 2004;101:17258-17263	B	6A	alpha				Haploid	1	1	1	1	1	1	H01	16	16	15	15	14	14	19	25	15	20	50	1	1	0	1	1	0	1	1	0	0	0	0	1	1	0	1
E758/2005	CBS10485, WM09.144	CBS	Cryptococcus gattii	Herning, Denmark	North America	CSF of 51y HIV negative male who traveled on Vancouver Island, strain is intermediate for fluconazole	Clinical	Lindberg et al. Emerg Infect Dis 2007;13:178-179	nd	6A	alpha	1.78	3.9			1	1	1	1	1	1	H01	16	16	15	15	14	14	19	25	15	20	50	1	1	0	1	1	0	1	1	0	0	0	0	1	1	0	1
EJB12	CBS11544	CBS	Cryptococcus gattii	Oregon, USA, human, 2008	North America	Human	Clinical	Byrnes et al. J Infect Dis 2009;199:1081-1086	B	6C	alpha					25	3	3	1	8	39	H03	16	10	9	10	8.1	17	11	6	27	9	71	1	1	0	1	1	0	1	1	0	0	0	0	1	1	1	1
EJB14	CBS11543	CBS	Cryptococcus gattii	Oregon, USA, veterinary, 2007	North America	Veterinary	Veterinary	Byrnes et al. J Infect Dis 2009;199:1081-1086	B	6C	alpha					25	3	3	1	8	39	H03	16	10	9	10	8.1	17	11	6	27	9	71	1	1	0	1	1	0	1	1	0	0	0	0	1	1	1	1
EJB15	CBS11542	CBS	Cryptococcus gattii	Oregon, USA, veterinary, 2007	North America	Veterinary	Veterinary	Byrnes et al. J Infect Dis 2009;199:1081-1086	B	6C	alpha					25	3	3	1	8	39	H03	16	10	9	10	8.1	17	11	6	27	9	71	1	1	0	1	1	0	1	1	0	0	0	0	1	1	1	1
EJB18	CBS11541	CBS	Cryptococcus gattii	Oregon, USA, human, 2008	North America	Human	Clinical	Byrnes et al. J Infect Dis 2009;199:1081-1086	B	6C	alpha					25	3	3	1	8	39	H03	11	10	9	10	8.1	17	11	6	27	9	59	1	1	0	1	1	0	1	1	0	0	0	0	1	1	1	1
ENV131	131, JH3074, CBS11246, WM02.219	CBS, MMRL	Cryptococcus gattii	Rathrevor Beach, Parkville, British Columbia, Canada	North America	Douglas Fir tree #131	Environmental	Kidd et al. Proc. Natl. Acad. Science USA 2004;101:17258-17263	B	6A	alpha				Haploid	1	1	1	1	1	1	H01	16	16	15	15	14	14	19	25	15	20	50	1	1	0	1	1	0	1	1	0	0	0	0	1	1	0	1
ENV133	133, JH3075, WM02.214	CBS, MMRL	Cryptococcus gattii	Rathrevor Beach, Parkville, British Columbia, Canada	North America	Douglas Fir tree #133	Environmental	Kidd et al. Proc. Natl. Acad. Science USA 2004;101:17258-17263	B	6B	alpha				Haploid	1	2	2	2	2	3	H01	14	9.1	9	14	9.1	14	10	8	35	4	24	1	1	0	1	1	0	1	1	0	0	0	0	1	1	0	1
ENV152	152, JH3076, CBS11245, WM02.221	CBS, MMRL	Cryptococcus gattii	Rathrevor Beach, Parkville, British Columbia, Canada	North America	Alder tree #152	Environmental	Kidd et al. Proc. Natl. Acad. Science USA 2004;101:17258-17263	B	6A	alpha				Haploid	7	1	1	1	1	12	H01	16	16	15	15	14	14	19	25	15	20	50	1	1	0	1	1	0	1	1	0	0	0	0	1	1	0	1
HEC11102	WM477, WM540, LMM21, CBS11250, LA84	CBS, MMRL	Cryptococcus gattii	Rio de Janeiro, Brazil	South America (Brazil)	Urine of HIV positive 53y male, isolated at 14/09/1994	Clinical	Igreja et al. Med Mycol 2004;42:229-238	B	6	a					8	13	3	1	8	13	H15	16	11	9	12	9.1	11	10	5	43	34	39	1	1	0	1	1	0	1	1	0	0	0	0	1	1	1	1
HOO58-I-0638	WM04.76, LA567	MMRL	Cryptococcus gattii	Caquetá, Colombia	South America (Colombia)	CSF 34y female human, none predisposing factors (y.o.i. 1997)	Clinical	Meyer et al. Emerg. Infect. Dis 2003;9:189-195	B	6	a					12	5	13	1	13	19	H18	14.1	11	9	10	9.1	8	10	6	8	20	33	1	1	0	1	1	0	1	1	0	0	0	0	1	1	1	1
HOO58-I-0652	LA571, WM05.348	MMRL	Cryptococcus gattii	Medellín, Colombia	South America (Colombia)	CSF of [status unknown] 11y male isolated in 1998	Clinical	This study	B	6	a					4	5	13	1	5	9	H19	15.1	11	9	10	9.1	8	10	6	8	20	36	1	1	0	1	1	0	1	1	0	0	0	0	1	1	1	1
HOO58-I-0675	WM04.77, LA584	MMRL	Cryptococcus gattii	Bolivar, Colombia	South America (Colombia)	CSF 23y male human, none predisposing factors (y.o.i. 1998)	Clinical	Meyer et al. Emerg. Infect. Dis 2003;9:189-195	B	6	a					4	5	13	1	5	9	H19	14.1	13	9	10	9.1	8	10	6	8	22	44	1	1	0	1	1	0	1	1	0	0	0	0	1	1	1	1
HOO58-I-0675M	WM04.77 Mucoid (original: LA584#, HOO58-I-675, WM04.77)	MMRL	Cryptococcus gattii	Bolivar, Colombia	South America (Colombia)	CSF 23y male human, no predisposing factors (y.o.i. 1998)	Clinical	Meyer et al. Emerg. Infect. Dis 2003;9:189-195	B	6	a					4	5	13	1	5	9	H19	14.1	13	9	10	9.1	8	10	6	8	22	44	1	1	0	1	1	0	1	1	0	0	0	0	1	1	1	1
HOO58-I-0675S	WM04.77 Slimy (original: LA584#, HOO58-I-675, WM04.77)	MMRL	Cryptococcus gattii	Bolivar, Colombia	South America (Colombia)	CSF 23y male human, no predisposing factors (y.o.i. 1998)	Clinical	Meyer et al. Emerg. Infect. Dis 2003;9:189-195	B	6	a					4	5	13	1	5	9	H19	14.1	13	9	10	9.1	8	10	6	8	22	44	1	1	0	1	1	0	1	1	0	0	0	0	1	1	1	1
HOO58-I-0762	LA590#, WM04.78	MMRL	Cryptococcus gattii	Santander, Colombia	South America (Colombia)	CSF 48y male human, none predisposing factors (y.o.i. 1998)	Clinical	Meyer et al. Emerg. Infect. Dis 2003;9:189-195	B	6	alpha				Haploid	20	5	14	11	14	29	H13	12	6	9	10	11.1	9	12	6	4	10	12	1	1	0	1	1	0	1	1	0	0	0	0	0	1	1	1
HOO58-I-0881	WM04.79, LA599	MMRL	Cryptococcus gattii	N. Santander, Colombia	South America (Colombia)	CSF 33y male human, none predisposing factors (y.o.i. 1999)	Clinical	Meyer et al. Emerg. Infect. Dis 2003;9:189-195	B	6	a					4	5	13	1	5	9	H19	15.1	11	9	10	9.1	8	10	6	8	20	36	1	1	0	1	1	0	1	1	0	0	0	0	1	1	1	1
HOO58-I-1278	LA753#, WM05.275	MMRL	Cryptococcus gattii	Cúcuta, North Santander, Colombia	South America (Colombia)	CSF of HIV negative 39y male isolated in 2001	Clinical	Meyer et al. Emerg. Infect. Dis 2003;9:189-195	B	6	a					4	5	13	1	5	9	H19	15.1	11	9	10	9.1	8	10	6	8	20	36	1	1	0	1	1	0	1	1	0	0	0	0	1	1	1	1
HOO58-I-1388	WM05.276	MMRL	Cryptococcus gattii	Cúcuta, Colombia	South America (Colombia)	CSF of [status unknown] 60y male isolated in 2001	Clinical	Escandón et al. (2006) FEMS Yeast Res 6:625-635	B	6	a					4	5	13	1	5	9	H19	14.1	12	9	10	9.1	8	10	6	8	20	40	1	1	0	1	1	0	1	1	0	0	0	0	1	1	1	1
HOO58-I-1391	WM05.349	MMRL	Cryptococcus gattii	Cali, Colombia	South America (Colombia)	Lung biopt of [status unknown] 61y female isolated in 2001	Clinical	Escandón et al. (2006) FEMS Yeast Res 6:625-635	B	6	a					4	5	13	1	5	9	H19	14.1	11	9	10	9.1	8	10	6	8	20	33	1	1	0	1	1	0	1	1	0	0	0	0	1	1	1	1
HOO58-I-1511	WM05.399	MMRL	Cryptococcus gattii	Cúcuta, Colombia	South America (Colombia)	CSF of HIV negative 54y male isolated in 2002	Clinical	Escandón et al. (2006) FEMS Yeast Res 6:625-635	B	6	a					4	5	13	1	5	9	H19	15.1	11	9	10	9.1	8	10	6	8	20	36	1	1	0	1	1	0	1	1	0	0	0	0	1	1	1	1
HOO58-I-1543	WM05.397	MMRL	Cryptococcus gattii	Bogotá, Colombia	South America (Colombia)	Sputum of [status unknown] 65y male isolated in 2002	Clinical	Escandón et al. (2006) FEMS Yeast Res 6:625-635	B	6	alpha					29	5	16	8	8	47	H28	12	11	9	12	10.1	9	10	5	5	32	38	1	1	0	1	1	0	1	1	0	0	0	0	1	1	1	0
HOO58-I-1647	WM05.396	MMRL	Cryptococcus gattii	Cundinamarca, Colombia	South America (Colombia)	Eucalyptus spp. tree, isolated in 2003	Environmental	Escandón et al. (2005) Biomédica 25:390-397	B	6	a					4	5	13	1	5	9	H19	15.1	11	9	10	9.1	8	10	6	8	20	36	1	1	0	1	1	0	1	1	0	0	0	0	1	1	1	1
HOO58-I-1648	WM05.339	MMRL	Cryptococcus gattii	Cundinamarca, Colombia	South America (Colombia)	Eucalyptus spp. tree, isolated in 2003	Environmental	Escandón et al. (2005) Biomédica 25:390-397	B	6	a					4	5	13	1	5	9	H19	15.1	11	9	10	9.1	8	10	6	8	20	36	1	1	0	1	1	0	1	1	0	0	0	0	1	1	1	1
HOO58-I-1683	WM05.343	MMRL	Cryptococcus gattii	Cundinamarca, Colombia	South America (Colombia)	Eucalyptus spp. tree, isolated in 2003	Environmental	Escandón et al. (2005) Biomédica 25:390-397	B	6	a					4	5	13	1	5	9	H19	15.1	11	9	10	9.1	8	10	6	8	20	36	1	1	0	1	1	0	1	1	0	0	0	0	1	1	1	1
HOO58-I-1697	WM05.316	MMRL	Cryptococcus gattii	Cundinamarca, Colombia	South America (Colombia)	Eucalyptus spp. tree, isolated in 2003	Environmental	Escandón et al. (2006) FEMS Yeast Res 6:625-635	B	6	a					4	5	13	1	5	9	H19	15.1	11	9	10	9.1	8	10	6	8	20	36	1	1	0	1	1	0	1	1	0	0	0	0	1	1	1	1
HOO58-I-1751	WM05.281	MMRL	Cryptococcus gattii	Bogotá, Colombia	South America (Colombia)	bark debris, isolated in 2003	Environmental	Escandón et al. (2006) FEMS Yeast Res 6:625-635	B	6	a					4	5	13	1	5	9	H19	15.1	11	9	10	9.1	8	10	6	8	20	36	1	1	0	1	1	0	1	1	0	0	0	0	1	1	1	1
HOO58-I-1777	WM05.288	MMRL	Cryptococcus gattii	Bogotá, Colombia	South America (Colombia)	Tree hollow, isolated in 2003	Environmental	Escandón et al. (2006) FEMS Yeast Res 6:625-635	B	6	a					4	5	13	1	5	9	H19	15.1	11	9	10	9.1	8	10	6	8	20	36	1	1	0	1	1	0	1	1	0	0	0	0	1	1	1	1
HOO58-I-1832	WM05.295	MMRL	Cryptococcus gattii	Bogotá, Colombia	South America (Colombia)	Tree soil, isolated in 2003	Environmental	Escandón et al. (2006) FEMS Yeast Res 6:625-635	B	6	a					4	5	13	1	5	9	H19	15.1	11	9	10	9.1	8	10	6	8	20	36	1	1	0	1	1	0	1	1	0	0	0	0	1	1	1	1
HOO58-I-1833	WM05.296	MMRL	Cryptococcus gattii	Bogotá, Colombia	South America (Colombia)	Bark debris, isolated in 2003	Environmental	Escandón et al. (2006) FEMS Yeast Res 6:625-635	B	6	a					4	5	13	1	5	9	H19	15.1	11	9	10	9.1	8	10	6	8	20	36	1	1	0	1	1	0	1	1	0	0	0	0	1	1	1	1
HOO58-I-1850	WM05.305	MMRL	Cryptococcus gattii	Bogotá, Colombia	South America (Colombia)	Bark debris, isolated in 2003	Environmental	Escandón et al. (2006) FEMS Yeast Res 6:625-635	B	6	a					4	5	13	1	5	9	H19	15.1	11	9	10	9.1	8	10	6	8	20	36	1	1	0	1	1	0	1	1	0	0	0	0	1	1	1	1
HOO58-I-1856	WM05.306	MMRL	Cryptococcus gattii	Bogotá, Colombia	South America (Colombia)	Tree soil, isolated in 2003	Environmental	Escandón et al. (2006) FEMS Yeast Res 6:625-635	B	6	a					4	5	13	1	5	9	H19	15.1	11	9	10	9.1	8	10	6	8	20	36	1	1	0	1	1	0	1	1	0	0	0	0	1	1	1	1
HOO58-I-1880	WM05.330	MMRL	Cryptococcus gattii	Cundinamarca, Colombia	South America (Colombia)	Eucalyptus spp. tree, isolated in 2003	Environmental	Escandón et al. (2006) FEMS Yeast Res 6:625-635	B	6	a					4	5	13	1	5	9	H19	15.1	11	9	10	9.1	8	10	6	8	20	36	1	1	0	1	1	0	1	1	0	0	0	0	1	1	1	1
HOO58-I-1900	WM05.336	MMRL	Cryptococcus gattii	Cundinamarca, Colombia	South America (Colombia)	Eucalyptus spp. tree, isolated in 2003	Environmental	Escandón et al. (2006) FEMS Yeast Res 6:625-635	B	6	a					4	5	13	1	5	9	H19	15.1	11	9	10	9.1	8	10	6	8	20	36	1	1	0	1	1	0	1	1	0	0	0	0	1	1	1	1
HOO58-I-1942	WM05.362, WM08.303	MMRL	Cryptococcus gattii	Medellín, Colombia	South America (Colombia)	Terminalia catappa (almond) tree, isolated in 2003	Environmental	Escandón et al. (2006) FEMS Yeast Res 6:625-635	B	6	a					4	5	13	1	5	9	H19	15.1	11	9	10	9.1	8	10	6	8	20	36	1	1	0	1	1	0	1	1	0	0	0	0	1	1	1	1
HOO58-I-2275	WM05.358	MMRL	Cryptococcus gattii	Cali, Colombia	South America (Colombia)	Eucalyptus spp. tree, isolated in 2003	Environmental	Escandón et al. (2006) FEMS Yeast Res 6:625-635	B	6	a					4	5	13	1	5	9	H19	15.1	11	9	10	9.1	8	10	6	8	20	36	1	1	0	1	1	0	1	1	0	0	0	0	1	1	1	1
ICB107	MT-107	CBS, ICB	Cryptococcus gattii	São Paulo, Brazil	South America (Brazil)	CSF of an HIV negative human	Clinical	Barreto de Oliveira et al. J. Clin. Microbiol 2004;42:1356-1359	B	6A	alpha					1	1	1	1	10	2	H01	18	16	16	13	15	16	18	30	15	20	55	1	1	0	1	1	0	1	1	0	0	0	0	1	1	0	1
ICB179	MT-W2	CBS, ICB	Cryptococcus gattii	São Paulo, Brazil	South America (Brazil)	Eucalyptus spp. Tree	Environmental	Barreto de Oliveira et al. J. Clin. Microbiol 2004;42:1356-1359	B	6	alpha			Yes		29	18	5	2	9	49	H26	13	7	12	10	11.1	11	10	6	24	22	20	1	1	0	1	1	0	1	1	0	0	0	0	0	1	1	1
ICB180	MT-W4, CBS11253	CBS, ICB	Cryptococcus gattii	São Paulo, Brazil	South America (Brazil)	Eucalyptus spp. Tree	Environmental	Barreto de Oliveira et al. J. Clin. Microbiol 2004;42:1356-1359	B	6	alpha	0.42	14.9			29	18	5	2	9	49	H26	13	7	12	10	11.1	11	10	6	24	22	20	1	1	0	1	1	0	1	1	0	0	0	0	0	1	1	1
ICB184	MT-Pi2, CBS11251	CBS, ICB	Cryptococcus gattii	Piauí, Brazil	South America (Brazil)	Hollow tree	Environmental	Barreto de Oliveira et al. J. Clin. Microbiol 2004;42:1356-1359	B	6	alpha				Haploid	15	2	19	2	8	23	H07	14	5	9	14	11.1	11	10	16	39	11	7	1	1	0	1	1	0	1	1	0	0	0	0	1	1	1	0
ICB97	MT-97	CBS, ICB	Cryptococcus gattii	São Paulo, Brazil	South America (Brazil)	CSF of an HIV negative human	Clinical	Barreto de Oliveira et al. J. Clin. Microbiol 2004;42:1356-1359	B	6	alpha					11	15	18	2	5	17	H06	21	10	10	10	10.1	9	11	9	19	14	31	1	1	0	1	1	0	1	1	0	0	0	1	1	0	1	1
IFM46914	WM05.426, 37-40-40, 20764, DMST20764	IFM, MMRL	Cryptococcus gattii	Thailand	Australasia	CSF from human, isolated 04/oct/1994, HIV-status unknown (Phramongkut Hospital)	Clinical	Poonwan et al. Eur J Epidemiol 1997;13:335-340	B	6B	alpha					2	2	2	2	2	4	H03	14	9.1	9	14	9.1	14	10	8	35	4	24	1	1	0	1	1	0	1	1	0	0	0	0	1	1	1	1
IFM46915	WM05.427, 37-140-140, 20763, DMST20763	IFM, MMRL	Cryptococcus gattii	Thailand	Australasia	CSF from human, isolated 14/oct/1994, HIV-status unknown (Chiangrai Hospital)	Clinical	Poonwan et al. Eur J Epidemiol 1997;13:335-340	B	6B	alpha					2	2	2	2	2	4	H03	14	9.1	9	14	9.1	14	10	8	35	4	24	1	1	0	1	1	0	1	1	0	0	0	0	1	1	1	1
IFM46916	WM05.428, 37-362-28, 20766, DMST20766	IFM, MMRL	Cryptococcus gattii	Thailand	Australasia	CSF from HIV-positive human, isolated 03/oct/1994 (Bamrasnaradura Hospital)	Clinical	Poonwan et al. Eur J Epidemiol 1997;13:335-340	B	6B	alpha					2	2	2	2	2	4	H03	14	9.1	9	14	9.1	14	10	8	35	4	24	1	1	0	1	1	0	1	1	0	0	0	0	1	1	1	1
IFM46917	WM05.429, 37-381-47, 20765, DMST20765	IFM, MMRL	Cryptococcus gattii	Thailand	Australasia	CSF from human, isolated 14/nov/1994, HIV-status unknown (Chiangrai Hospital)	Clinical	Poonwan et al. Eur J Epidemiol 1997;13:335-340	B	6B	alpha					2	2	2	2	2	4	H03	14	9.1	9	14	9.1	14	10	8	35	4	24	1	1	0	1	1	0	1	1	0	0	0	0	1	1	1	1
IFM46918	WM05.430, 37-1852-23, 20768, DMST20768	IFM, MMRL	Cryptococcus gattii	Thailand	Australasia	CSF from HIV-positive human, isolated 30/aug/1994 (Bamrasnaradura Hospital)	Clinical	Poonwan et al. Eur J Epidemiol 1997;13:335-340	B	6B	alpha					2	2	2	2	2	4	H03	14	9.1	9	14	9.1	14	10	8	35	4	24	1	1	0	1	1	0	1	1	0	0	0	0	1	1	1	1
IFM46919	WM05.431, 38-1539-59, 20767, DMST20767	IFM, MMRL	Cryptococcus gattii	Thailand	Australasia	CSF from human, isolated 17/apr/1995, HIV-status unknown (Sapprasittiprasong Hospital)	Clinical	Poonwan et al. Eur J Epidemiol 1997;13:335-340	B	6B	alpha					2	2	2	2	2	4	H03	14	9.1	9	14	9.1	14	10	8	35	4	24	1	1	0	1	1	0	1	1	0	0	0	0	1	1	1	1
IFM47258	WM05.432, F-1623	IFM, MMRL	Cryptococcus gattii	Funabashi, Japan	South America (Brazil)	Human, patient born in Brazil	Clinical	Imai et al. Clin Lab 2000;46:345-354	B	6A	alpha					1	1	1	1	1	1	H01	16	16	15	15	14	14	19	25	15	20	50	1	1	0	1	1	0	1	1	0	0	0	0	1	1	0	1
IHEM11489Slimy	RV68683; IHEM11489S	CBS, IHEM	Cryptococcus gattii	Kinshasa, Republic of Congo	Africa	CSF of AIDS patient, isolated in Microbiology Lab of Kinshasa Hospital in 1991;	Clinical	Hagen et al. Antimicrobial Agents Chemother 2010;54:5139-5145	B	6	alpha	1.77	avirulent			23	4	4	2	29	37	H30	15	14	9	14	10.1	9	10	10	5	10	69	1	1	0	1	1	0	1	0	0	0	0	0	0	1	1	1
IHEM11489White	RV68683; IHEM11489W	CBS, IHEM	Cryptococcus gattii	Kinshasa, Republic of Congo	Africa	CSF of AIDS patient, isolated in Microbiology Lab of Kinshasa Hospital in 1991	Clinical	Hagen et al. Antimicrobial Agents Chemother 2010;54:5139-5145	B	6	alpha					23	4	4	2	29	37	H30	15	14	9	14	10.1	9	10	10	5	10	69	1	1	0	1	1	0	1	0	0	0	0	0	0	1	1	1
IP01/935-1	2001/935-1	IP	Cryptococcus gattii	Senegal	Africa	BAL of HIV-positive 35y-old male (isolated in 2001)	Clinical	Fraser et al. Nature 2005;437:1360-1364	B	6	alpha	2.92	14.3			24	5	6	3	21	38	H27	12	6	10	12	11.1	11	10	5	5	12	78	1	1	0	1	1	0	1	1	0	0	0	0	0	1	1	1
IP03/125	2003/125	IP	Cryptococcus gattii	France	Africa	CSF of AIDS patient, 51y-old male (isolated in 2003); known travel history to Africa	Clinical	Fraser et al. Nature 2005;437:1360-1364	B	6	alpha					26	1	8	2	1	40	H03	11	12	9	14	10.1	11	11	10	4	26	77	1	1	0	1	1	0	1	1	0	1	0	0	1	1	1	1
IP04/335	2004/335	IP	Cryptococcus gattii	French Guyana	South America (French Guyana)	Known travel history within South America	Clinical	Fraser et al. Nature 2005;437:1360-1364	nd	6	alpha	2.75	6.4			22	6	10	5	22	34	H20	13	7	9	9	11.1	7	11	6	45	19	79	1	1	0	1	1	0	1	1	0	0	1	0	1	1	1	1
IP04/606	2004/606	IP	Cryptococcus gattii	French Guyana	South America (French Guyana)	Lung of immunocompetent 64y-old male (isolated in 2004); known travel history within South America	Clinical	Fraser et al. Nature 2005;437:1360-1364	B	6	alpha					22	6	9	5	22	33	H20	14	7	9	9	11.1	7	11	6	45	19	80	1	1	0	1	1	0	1	1	0	1	1	0	0	1	1	1
IP04/681	2004/681	IP	Cryptococcus gattii	French Guyana	South America (French Guyana)	Lung of immunocompetent 64y-old female (isolated in 2004); known travel history within South America	Clinical	Fraser et al. Nature 2005;437:1360-1364	B	6	alpha					22	6	9	5	22	33	H20	14	7	9	9	11.1	7	11	6	45	19	80	1	1	0	1	1	0	1	1	0	0	0	0	0	1	1	1
IP06/194	2006/194	IP	Cryptococcus gattii	France	Europe	Lung of immunocompetent 52y-old female (isolated in 2006)	Clinical	This study	B	nd	alpha					22	6	9	5	22	33	H20	14	7	9	9	11.1	7	11	6	45	20	67	1	1	0	1	1	0	1	1	0	0	1	0	0	1	1	1
IP93/980	1993/980	IP	Cryptococcus gattii	France	Europe	Clinical; Never travelled abroad France; patient was a market seller who sold exotic fruits on the market	Clinical	Fraser et al. Nature 2005;437:1360-1364	nd	6	alpha	2.20				22	7	5	4	27	32	H32	13	7	9	9	12.1	9	11	9	44	26.2	65	1	1	0	1	1	0	1	1	0	0	0	0	0	1	1	1
IP96/1120-1	1996/1120-1	IP	Cryptococcus gattii	France	Africa	Clinical; Patient moved from Africa to France	Clinical	Fraser et al. Nature 2005;437:1360-1364	nd	6	alpha					24	5	6	3	21	38	H27	12	6	10	12	11.1	11	10	5	5	9	63	1	1	0	1	1	0	1	1	0	0	0	0	0	1	1	1
IP96/1120-2	1996/1120-2	IP	Cryptococcus gattii	France	Africa	Clinical; Patient moved from Africa to France	Clinical	Fraser et al. Nature 2005;437:1360-1364	nd	6	alpha					24	5	6	3	21	38	H27	12	6	10	12	11.1	11	10	5	5	9	63	1	1	0	1	1	0	1	1	0	0	0	0	0	1	1	1
IP97/170	1997/170	IP	Cryptococcus gattii	French Guyana	South America (French Guyana)	CSF from immunocompetent 36y-old male (isolated in 1997); known travelhistory within South America	Clinical	Fraser et al. Nature 2005;437:1360-1364	B	6	alpha	2.82	6.9			27	8	7	2	28	43	H25	12	5.1	10	13	11.1	9	10	8	5	19	62	1	1	0	1	1	0	1	1	0	0	0	0	0	1	1	1
IP98/1037-1	1998/1037-1	IP	Cryptococcus gattii	France	Africa	Clinical; Patient moved from Africa to France	Clinical	Fraser et al. Nature 2005;437:1360-1364	nd	6B	alpha					26	1	8	2	1	40	H03	16	12	9	14	10.1	11	11	10	4	29.2	72	1	1	0	1	1	0	1	1	0	0	0	0	1	1	1	1
IP98/1037-2	1998/1037-2	IP	Cryptococcus gattii	France	Africa	Clinical; Patient moved from Africa to France	Clinical	Fraser et al. Nature 2005;437:1360-1364	nd	6B	alpha					26	1	8	2	1	40	H03	11	12	9	14	10.1	11	11	10	4	28.2	61	1	1	0	1	1	0	1	1	0	0	0	0	1	1	1	1
IP98/1132	1998/1132	IP	Cryptococcus gattii	Caribbean Islands	South America (Caribbean)	Clinical	Clinical	Fraser et al. Nature 2005;437:1360-1364	nd	6	alpha	1.87				22	6	9	5	22	33	H20	13	7	9	9	11.1	7	11	6	47	19	64	1	1	0	1	1	0	1	1	0	0	1	0	1	1	1	1
IP99/901-1	1999/901-1	IP	Cryptococcus gattii	France	Africa	BAL of 27y old HIV2-positive female (see IP99/901-2; isolated in 1999); known travel history to Ivory Coast (Africa)	Clinical	Fraser et al. Nature 2005;437:1360-1364	B	nd	alpha					24	5	6	3	21	38	H27	12	6	10	12	11.1	11	10	5	5	9	63	1	1	0	1	1	0	1	1	0	0	0	0	0	1	1	1
IP99/901-2	1999/901-2	IP	Cryptococcus gattii	France	Africa	Lung biopsy of HIV2-positive 27y-old female (see IP99/901-1; isolated in 1999); known travel history to Ivory Coast (Africa)	Clinical	Fraser et al. Nature 2005;437:1360-1364	B	nd	alpha					24	5	6	3	21	38	H27	12	6	10	12	11.1	11	10	5	5	9	63	1	1	0	1	1	0	1	1	0	0	0	0	0	1	1	1
LA295	WM04.186, 143839	MMRL	Cryptococcus gattii	Chaco, Argentina	South America (Argentina)	CSF of immunocompetent 40y male isolated in 2000	Clinical	Meyer et al. Emerg. Infect. Dis. 2003;9:189-195	nd	6A	alpha					1	1	1	1	1	1	H01	16	16	15	15	14	14	19	25	15	20	50	1	1	0	1	1	0	1	1	0	0	0	0	1	1	0	1
LA337	WM04.84, AFG-09/00	MMRL	Cryptococcus gattii	São Paulo, Brazil	South America (Brazil)	CSF 30y male human, HIV infected (y.o.i. 1996)	Clinical	Meyer et al. Emerg. Infect. Dis. 2003;9:189-195	B	6B	alpha				Haploid	29	3	24	2	16	46	H03	12	6	9	10	10.1	9	11	6	5	23	13	1	1	0	1	1	0	1	1	0	0	0	1	0	0	0	1
LA338	WM04.85, AFG-15/00	MMRL	Cryptococcus gattii	São Paulo, Brazil	South America (Brazil)	CSF 30y male human, HIV infected (y.o.i. 1996)	Clinical	Meyer et al. Emerg. Infect. Dis. 2003;9:189-195	B	6	alpha					20	7	14	4	6	30	H14	10	9	9	9	11.1	10	10	6	19	60	22	1	1	0	1	1	0	1	1	1	0	0	0	0	1	1	1
LA362	WM04.83, UNSP Bird1, Bird1, CBS11260	CBS, MMRL	Cryptococcus gattii	Jaboticabal, Brazil	South America (Brazil)	Parrot liver (y.o.i. 2000)	Veterinary	Meyer et al. Emerg. Infect. Dis. 2003;9:189-195	B	6	alpha	1.39	9.2		Haploid	21	21	23	2	15	31	H02	12	6	9	12	10.1	9	11	13	5	9	14	1	1	0	1	1	0	1	1	0	0	0	1	0	0	1	1
LA381	WM06.12, BV5	MMRL	Cryptococcus gattii	Maracaibo, Venezuela	South America (Venezuela)	CSF of [status unknown] 30y male, isolated 1996	Clinical	Meyer et al. Emerg. Infect. Dis. 2003;9:189-195	B	6	a					12	5	13	1	5	18	H19	14.1	11	9	10	9.1	8	10	6	8	28	34	1	1	0	1	1	0	1	1	0	0	0	0	1	1	1	1
LA386	WM1850, BV1218	MMRL	Cryptococcus gattii	Maracaibo, Venezuela	South America (Venezuela)	CSF of multiple sclerose 30y female, isolated 1999	Clinical	Meyer et al. Emerg. Infect. Dis. 2003;9:189-195	nd	6	a					4	5	13	1	5	9	H19	14.1	10	9	10	9.1	8	11	6	8	39	30	1	1	0	1	1	0	1	1	0	0	0	0	1	1	1	1
LA547	WM2023, HOO58-I-448	MMRL	Cryptococcus gattii	North Santander, Colombia	South America (Colombia)		Clinical	Meyer et al. Emerg. Infect. Dis. 2003;9:189-195	B	6	a					4	5	13	1	5	9	H19	14.1	11	9	10	9.1	8	10	6	8	20	33	1	1	0	1	1	0	1	1	0	0	0	0	1	1	1	1
LA55	WM04.80, FOC417	MMRL	Cryptococcus gattii	Piauí, Brazil	South America (Brazil)	CSF male human (y.o.i. 1995)	Clinical	Meyer et al. Emerg. Infect. Dis. 2003;9:189-195	B	6	a					26	10	12	2	4	41	H21	14	12	14	14	12.1	14	19	2	21	22	42	1	1	0	1	1	0	1	1	0	0	0	0	1	1	1	1
LA57	WM04.81, FOC506	MMRL	Cryptococcus gattii	Piauí, Brazil	South America (Brazil)	CSF male human (y.o.i. 1995)	Clinical	Meyer et al. Emerg. Infect. Dis. 2003;9:189-195	B	6B	alpha				Haploid	2	20	5	2	8	6	H03	16	5	9	14	9.1	11	10	6	35	4	9	1	1	0	1	1	0	1	1	0	0	0	0	1	1	1	1
LA61	WM04.82, FOC557	MMRL	Cryptococcus gattii	Piauí, Brazil	South America (Brazil)	CSF female human, HIV infected (y.o.i. 1997)	Clinical	Meyer et al. Emerg. Infect. Dis. 2003;9:189-195	B	6	alpha					15	2	19	2	8	23	H07	14	5	9	14	11.1	11	10	16	39	11	7	1	1	0	1	1	0	1	1	0	0	0	0	1	1	1	0
LMM1003	L2, L2b, WM05.552	LMM	Cryptococcus gattii	Piauí, Brazil	South America (Brazil)	CSF of HIV positive 15y female, isolated at 08/04/1992	Clinical	Trilles et al. Mem Inst Oswaldo Cruz 2008;103:455-562	B	6	alpha				Haploid	13	4	2	9	3	20	H10	10	18.1	9	15	10.1	11	10	8	28	12.5	58	1	1	0	1	1	0	1	1	0	0	0	0	1	1	1	1
LMM261	WM05.415	LMM	Cryptococcus gattii	Rio de Janeiro (state), Brazil	South America (Brazil)	CSF of HIV negative male, (truck-driver from Piauí) isolated isolated at 02/07/1989	Clinical	Trilles et al. Mem Inst Oswaldo Cruz 2008;103:455-562	B	6	a	1.42	6.0			26	10	12	2	8	42	H22	14	12	14	14	12.1	14	19	2	21	22	42	1	1	0	1	1	0	1	1	0	0	0	0	1	1	1	1
LMM265	HEC3665, WM05.416	LMM	Cryptococcus gattii	Rio de Janeiro, Brazil	South America (Brazil)	CSF from a HIV+ male	Clinical	Trilles et al. Mem Inst Oswaldo Cruz 2008;103:455-562	B	6	alpha	2.54	10.0			29	16	16	8	11	48	H24	27	10	13	17	13.1	9	10	6	12	11	32	1	1	0	1	1	0	1	1	0	0	0	1	0	0	1	1
LMM266	HEC3619, WM05.417	LMM	Cryptococcus gattii	Rio de Janeiro, Brazil	South America (Brazil)	CSF from a HIV- male	Clinical	Trilles et al. Mem Inst Oswaldo Cruz 2008;103:455-562	B	6	alpha					29	16	16	8	11	48	H24	27	10	13	17	13.1	9	10	6	12	11	32	1	1	0	1	1	0	1	1	0	0	0	1	0	0	1	1
LMM417	WM05.452, LA55	LMM	Cryptococcus gattii	Piauí, Brazil	South America (Brazil)	CSF of HIV negative 18y male, isolated at 8/4/1995	Clinical	Trilles et al. Mem Inst Oswaldo Cruz 2008;103:455-562	nd	6	a					26	10	12	2	4	41	H21	14	5	14	14	12.1	14	19	2	21	22	10	1	1	0	1	1	0	1	1	0	0	0	0	1	1	1	1
LMM504	WM05.457	LMM	Cryptococcus gattii	Piauí, Brazil	South America (Brazil)	CSF of HIV negative 18y male, isolated at 22/9/1995	Clinical	Trilles et al. Mem Inst Oswaldo Cruz 2008;103:455-562	nd	6	a					26	10	12	2	4	41	H21	14	5	14	14	12.1	14	19	2	21	22	10	1	1	0	1	1	0	1	1	0	0	0	0	1	1	1	1
LMM547.18.3A3	L6, L6b, WM05.470	LMM	Cryptococcus gattii	Piauí, Brazil	South America (Brazil)	Isolated 15/09/1993	Environmental	Trilles et al. Mem Inst Oswaldo Cruz 2008;103:455-562	B	6	alpha					14	10	2	10	5	21	H04	27	15.1	9	14	10.1	12	10	9	24	10	46	1	1	0	1	1	0	1	1	0	0	0	0	1	1	1	1
LMM551	HEC-EC4-BACO, EC4-BACO	LMM	Cryptococcus gattii	Piauí, Brazil	South America (Brazil)	Debris from Eucalyptus camaldulensis	Environmental	This study	B	6	alpha					15	12	19	2	8	24	H07	14	5	9	14	11.1	11	11	16	39	11	8	1	1	0	1	1	0	1	1	0	0	0	0	1	1	1	0
LMM566	WM05.460	LMM	Cryptococcus gattii	Piauí, Brazil	South America (Brazil)	CSF of HIV negative 48y female, isolated at 21/03/1997	Clinical	Trilles et al. Mem Inst Oswaldo Cruz 2008;103:455-562	B	6	alpha				Haploid	16	7	15	1	7	25	H31	11	6	9	9	11.1	9	12	6	4	24	11	1	1	0	1	1	0	1	1	0	0	0	0	0	1	1	1
LMM574.18.13A2	LMM547.18.13A2, HEC-OITI94	LMM	Cryptococcus gattii	Piauí, Brazil	South America (Brazil)	Pottery tree hollow	Environmental	This study	nd	6	alpha				Haploid	14	10	2	10	12	22	H05	27	15.1	9	14	10.1	12	11	9	24	10	47	1	1	0	1	1	0	1	1	0	0	0	0	1	1	1	1
LMM645	LMM645Slimy	LMM	Cryptococcus gattii	Ilha de Maraca, RR, Brazil	South America (Brazil)	Tree hollow	Environmental	Fortes et al. Mycoses 2001;44:137-140	B	6	a	2.37	10.0			17	17	20	8	9	26	H17	33	17	10	11	10.1	9	11	8	14	10	57	1	1	0	1	1	0	1	1	0	0	0	0	0	1	1	0
LMM860	WM05.530	LMM	Cryptococcus gattii	Roraima, Brazil	South America (Brazil)	CSF of an HIV negative male, isolated at 21/05/1999	Clinical	Trilles et al. Mem Inst Oswaldo Cruz 2008;103:455-562	B	6	alpha					16	7	15	1	7	25	H31	11	6	9	9	11.1	9	12	6	4	24	11	1	1	0	1	1	0	1	1	0	0	0	0	0	1	1	1
LMM861		LMM	Cryptococcus gattii	Roraima, Brazil	South America (Brazil)	CSF of an HIV negative male, isolated at 21/05/1999	Clinical	This study	B	6	alpha					16	7	15	1	7	25	H31	11	6	9	9	11.1	9	12	6	4	24	11	1	1	0	1	1	0	1	1	0	0	0	0	0	1	1	1
LMM892	WM05.533	LMM	Cryptococcus gattii	Mato Grosso do Sul, Brazil	South America (Brazil)	CSF of HIV positive 18y female, isolated at 01/10/1997	Clinical	Carriconde et al. PLoS One 2011;6:e16936	B	6	alpha					29	18	5	2	9	49	H26	13	7	12	10	11.1	11	10	6	24	22	20	1	1	0	1	1	0	1	1	0	0	0	0	0	1	1	1
LMM893	WM05.534	LMM	Cryptococcus gattii	Mato Grosso do Sul, Brazil	South America (Brazil)	CSF of HIV positive 18y female, isolated at 11/8/1998	Clinical	Trilles et al. Mem Inst Oswaldo Cruz 2008;103:455-562	B	6	alpha					29	18	5	2	9	49	H26	13	7	12	10	11.1	11	10	6	24	22	20	1	1	0	1	1	0	1	1	0	0	0	0	0	1	1	1
LMM920.10	S10	LMM	Cryptococcus gattii	Piauí, Brazil	South America (Brazil)	HIV negative 9y female	Clinical	Trilles et al. Mem Inst Oswaldo Cruz 2008;103:455-562	nd	6	alpha					8	13	21	1	5	14	H12	15	11	9	10	9.1	11	10	30	5	18	35	1	1	0	1	1	0	1	1	0	0	0	0	1	1	1	1
LMM920.10.1	S14	LMM	Cryptococcus gattii	Piauí, Brazil	South America (Brazil)	HIV negative 9y female	Clinical	Trilles et al. Mem Inst Oswaldo Cruz 2008;103:455-562	B	6	alpha					8	13	21	1	5	14	H12	15	11	9	10	9.1	11	10	30	5	18	35	1	1	0	1	1	0	1	1	0	0	0	0	1	1	1	1
LMM920.7	S7	LMM	Cryptococcus gattii	Piauí, Brazil	South America (Brazil)	HIV negative 9y female	Clinical	Trilles et al. Mem Inst Oswaldo Cruz 2008;103:455-562	nd	6	alpha					8	13	21	1	5	14	H12	15	11	9	10	9.1	11	10	30	5	18	35	1	1	0	1	1	0	1	1	0	0	0	0	1	1	1	1
LMM920.7.1	S11	LMM	Cryptococcus gattii	Piauí, Brazil	South America (Brazil)	HIV negative 9y female	Clinical	Trilles et al. Mem Inst Oswaldo Cruz 2008;103:455-562	B	6	alpha					8	13	21	1	5	14	H12	15	11	9	10	9.1	11	10	30	5	18	35	1	1	0	1	1	0	1	1	0	0	0	0	1	1	1	1
LMM920.8	S8	LMM	Cryptococcus gattii	Piauí, Brazil	South America (Brazil)	HIV negative 9y female	Clinical	Trilles et al. Mem Inst Oswaldo Cruz 2008;103:455-562	nd	6	alpha					8	13	21	1	5	14	H12	15	11	9	10	9.1	11	10	30	5	18	35	1	1	0	1	1	0	1	1	0	0	0	0	1	1	1	1
LMM920.8.1	S12	LMM	Cryptococcus gattii	Piauí, Brazil	South America (Brazil)	HIV negative 9y female	Clinical	Trilles et al. Mem Inst Oswaldo Cruz 2008;103:455-562	B	6	alpha					8	13	21	1	5	14	H12	15	11	9	10	9.1	11	10	30	5	18	35	1	1	0	1	1	0	1	1	0	0	0	0	1	1	1	1
LMM920.9	S9	LMM	Cryptococcus gattii	Piauí, Brazil	South America (Brazil)	HIV negative 9y female	Clinical	Trilles et al. Mem Inst Oswaldo Cruz 2008;103:455-562	nd	6	alpha					8	13	21	1	5	14	H12	15	11	9	10	9.1	11	10	30	5	18	35	1	1	0	1	1	0	1	1	0	0	0	0	1	1	1	1
LMM920.9.1	S13	LMM	Cryptococcus gattii	Piauí, Brazil	South America (Brazil)	HIV negative 9y female	Clinical	Trilles et al. Mem Inst Oswaldo Cruz 2008;103:455-562	B	6	alpha					8	13	21	1	5	14	H12	15	11	9	10	9.1	11	10	30	5	18	35	1	1	0	1	1	0	1	1	0	0	0	0	1	1	1	1
LMM994	L10	LMM	Cryptococcus gattii	Mato Grosso do Sul, Brazil	South America (Brazil)	Male, clinical status is unknown	Clinical	This study	BD	6	alpha					18	19	15	4	6	27	H08	10	6	10	10	11.1	9	4	6	13	14	15	1	1	0	1	1	0	1	1	0	0	0	0	0	1	1	1
MA21832	WM2971, WM05.551	MMRL	Cryptococcus gattii	Perth, Western Australia, Australia	Australasia	Horse, tracheal wash	Veterinary	Carriconde et al. PLoS One 2011;6:e16936	B	6B	alpha					2	2	2	2	2	4	H03	14	9.1	9	14	9.1	14	10	8	35	4	24	1	1	0	1	1	0	1	1	0	0	0	0	1	1	1	1
MAC-9	MAC9, JH3125, WM02.332	MMRL	Cryptococcus gattii	MacMillan Park, Cathedral Grove, British Columbia, Canada	North America	Cedar tree	Environmental	Kidd et al. Proc Natl Acad Science USA 2004;101:17258-17263	B	6A	alpha				Haploid	1	1	1	1	1	1	H01	16	16	15	15	14	14	19	25	15	20	50	1	1	0	1	1	0	1	1	0	0	0	0	1	1	0	1
MC-S-115	WM04.75	MMRL	Cryptococcus gattii	Bangkok, Thailand	Australasia	CSF from HIV positive human male (y.o.i. 1993)	Clinical	Sukroongreung et al. Mycopathologia 1996;135:75-78	B	6B	alpha					2	2	2	2	2	4	H03	14	9.1	9	14	9.1	14	10	8	35	4	24	1	1	0	1	1	0	1	1	0	0	0	0	1	1	1	1
MC-S-239	WM06.7	MMRL	Cryptococcus gattii	Thailand	Australasia	Human	Clinical	Sukroongreung et al. Mycopathologia 1996;135:75-78	B	6A	alpha					1	1	1	1	1	1	H01	16	7.1	12	10	11.1	11	10	6	15	22	21	1	1	0	1	1	0	1	1	0	0	0	0	1	1	0	1
MC-S-265	WM06.3	MMRL	Cryptococcus gattii	Thailand	Australasia	Human, isolated in 1995	Clinical	Sukroongreung et al. Mycopathologia 1996;135:75-78	B	6B	alpha					2	2	2	2	2	4	H03	14	9.1	9	14	9.1	14	10	8	35	4	24	1	1	0	1	1	0	1	1	0	0	0	0	1	1	1	1
MMRL1340	CBS11538	CBS	Cryptococcus gattii	Australia	Australasia		Clinical	Fraser et al. Nature 2005;437:1360-1364	B	6	alpha					28	9	25	1	17	44	H09	14	5	9	12	12.1	10	7	3	33	15	2	1	1	0	1	1	0	1	1	0	0	0	1	0	0	1	1
MMRL2647	CBS11540	CBS	Cryptococcus gattii	Sydney, Australia	Australasia	Human	Clinical	Fraser et al. Nature 2005;437:1360-1364	B	6	alpha					28	9	25	1	17	44	H09	14	5	9	12	12.1	10	7	3	44	32	6	1	1	0	1	1	0	1	1	0	0	0	1	0	0	1	1
NT-3	JH3724; CBS11537	CBS, MMRL	Cryptococcus gattii	Northern Territory, Australia	Australasia		Clinical	Campbell et al. Eukaryot Cell 2005;4:1403-1409	B	6	alpha					28	9	25	1	17	44	H09	13	5	9	12	12.1	10	7	3	40	17	5	1	1	0	1	1	0	1	1	0	0	0	1	0	0	1	1
NT-8	NT8, JH3729; CBS11553	CBS, MMRL	Cryptococcus gattii	Northern Territory, Australia	Australasia	Human	Clinical	Campbell et al. Eukaryot Cell 2005;4:1403-1409	B	6	alpha					28	9	25	1	17	44	H09	14	5	9	12	12.1	10	7	3	39	21	4	1	1	0	1	1	0	1	1	0	0	0	1	0	0	1	1
RAM15	WM04.69, JH3742	MMRL	Cryptococcus gattii	Ramingining, Northern Territory, Australia	Australasia	Eucalyptus miniata (d.o.i. August 25, 1999)	Environmental	Chen et al. Clin Infect Dis 2000;31:499-508	nd	6B	alpha					2	2	2	2	2	4	H03	14	9.1	9	14	9.1	14	10	8	36	4	28	1	1	0	1	1	0	1	1	0	0	0	0	1	1	1	1
RAM2	Ram002, Ram002b, WM03.27, JH3740	MMRL	Cryptococcus gattii	Ramingining, Arnhemland, Northern Territory, Australia	Australasia	Eucalyptus camaldulensis (y.o.i. 1999)	Environmental	Chen et al. Clin Infect Dis 2000;31:499-508	B	6B	alpha					2	2	2	2	2	4	H03	14	9.1	9	14	9.1	14	10	8	35	4	24	1	1	0	1	1	0	1	1	0	0	0	0	1	1	1	1
RAM5	JH3741,WM04.187	MMRL	Cryptococcus gattii	Arnhemland, Northern Territory, Australia	Australasia	Eucalyptus tetrodonta	Environmental	Chen et al. Clin Infect Dis 2000;31:499-508	B	6B	alpha					2	2	22	2	2	5	H03	14	9.1	9	14	9.1	14	10	8	35	4	24	1	1	0	1	1	0	1	1	0	0	0	0	1	1	1	1
RB14	JH3087, CBS11257, WM02.292	CBS, MMRL	Cryptococcus gattii	Rathrevor Beach, Parkville, British Columbia, Canada	North America	Hollow from Douglas Fir tree #113	Environmental	Kidd et al. Proc Natl Acad Science USA 2004;101:17258-17263	B	6A	alpha				Haploid	19	1	1	1	1	28	H01	16	16	15	15	14	14	19	25	15	20	50	1	1	0	1	1	0	1	1	0	0	0	0	1	1	0	1
RB19	WM02.296	CBS, MMRL	Cryptococcus gattii	Rathrevor Beach, Parkville, British Columbia, Canada	North America	Hollow from Douglas Fir tree #113	Environmental	Kidd et al. Proc Natl Acad Science USA 2004;101:17258-17263	B	6A	alpha				Haploid	1	1	1	1	1	1	H01	16	16	15	15	14	14	19	25	15	20	50	1	1	0	1	1	0	1	1	0	0	0	0	1	1	0	1
RB28	WM02.301	CBS, MMRL	Cryptococcus gattii	Rathrevor Beach, Parkville, British Columbia, Canada	North America	tree stump near Alder tree #153	Environmental	Kidd et al. Proc Natl Acad Science USA 2004;101:17258-17263	B	6B	alpha			Yes	Haploid	2	2	2	2	2	4	H03	14	9.1	9	14	9.1	14	10	8	35	4	24	1	1	0	1	1	0	1	1	0	0	0	0	1	1	1	1
RB35	JH3101, WM02.308	CBS, MMRL	Cryptococcus gattii	Rathrevor Beach, Parkville, British Columbia, Canada	North America	Composite swab 5m E of Douglas Fir tree #113	Environmental	Kidd et al. Proc Natl Acad Science USA 2004;101:17258-17263	B	6A	alpha				Haploid	1	1	1	1	1	1	H01	16	16	15	15	14	14	19	25	15	20	50	1	1	0	1	1	0	1	1	0	0	0	0	1	1	0	1
RB4	JH3081, WM02.286	CBS, MMRL	Cryptococcus gattii	Rathrevor Beach, Parkville, British Columbia, Canada	North America	Hollow from Douglas Fir tree #113	Environmental	Kidd et al. Proc Natl Acad Science USA 2004;101:17258-17263	B	6A	alpha				Haploid	1	1	1	1	1	1	H01	16	16	15	15	14	14	19	25	15	20	50	1	1	0	1	1	0	1	1	0	0	0	0	1	1	0	1
RB46	JH3107, WM02.314	CBS, MMRL	Cryptococcus gattii	Rathrevor Beach, Parkville, British Columbia, Canada	North America	Alder tree #152	Environmental	Kidd et al. Proc Natl Acad Science USA 2004;101:17258-17263	B	6A	alpha					1	1	1	1	1	1	H01	16	16	15	15	14	14	19	25	15	20	50	1	1	0	1	1	0	1	1	0	0	0	0	1	1	0	1
RB50	JH3109, CBS11256, WM02.316	CBS, MMRL	Cryptococcus gattii	Rathrevor Beach, Parkville, British Columbia, Canada	North America	Composite swab 2m W of Alder tree #152	Environmental	Kidd et al. Proc Natl Acad Science USA 2004;101:17258-17263	B	6A	alpha	1.87	6.0			1	1	1	1	1	1	H01	16	16	15	15	14	14	19	25	15	20	50	1	1	0	1	1	0	1	1	0	0	0	0	1	1	0	1
RB52	WM02.317, JH3110	CBS, MMRL	Cryptococcus gattii	Rathrevor Beach, Parkville, British Columbia, Canada	North America	Grand Fir, 2m from RB50	Environmental	Kidd et al. Proc Natl Acad Science USA 2004;101:17258-17263	B	6B	alpha					2	2	2	2	2	4	H03	14	9.1	9	14	9.1	14	10	8	35	4	24	1	1	0	1	1	0	1	1	0	0	0	0	1	1	1	1
RB55	JH3112, WM02.319	CBS, MMRL	Cryptococcus gattii	Rathrevor Beach, Parkville, British Columbia, Canada	North America	Garry Oak, composite swab, parking place #5	Environmental	Kidd et al. Proc Natl Acad Science USA 2004;101:17258-17263	B	6A	alpha					1	1	1	1	1	1	H01	16	16	15	15	14	14	19	25	15	20	50	1	1	0	1	1	0	1	1	0	0	0	0	1	1	0	1
RB59FH	RB59, RB59Haploid, CBS11259	CBS	Cryptococcus gattii	Rathrevor Beach, Parkville, British Columbia, Canada	North America	Retest of Douglas Fir #126 (hollow 2: 1/2)	Environmental	Kidd et al. Proc Natl Acad Science USA 2004;101:17258-17263	B	6A	alpha	1.81	4.0		Haploid	1	1	1	1	1	1	H01	16	16	15	15	14	14	19	25	15	20	50	1	1	0	1	1	0	1	1	0	0	0	0	1	1	0	1
RB59JF	RB59, RB59Diploid, CBS11258	CBS	Cryptococcus gattii	Rathrevor Beach, Parkville, British Columbia, Canada	North America	Retest of Douglas Fir #126 (hollow 2: 1/2)	Environmental	Kidd et al. Proc Natl Acad Science USA 2004;101:17258-17263	B	6A	alpha				Diploid	1	1	1	1	1	1	H01	16	16	15	15	14	14	19	23	15	20	49	1	1	0	1	1	0	1	1	0	0	0	0	1	1	0	1
RB59WM	RB59, WM02.323	CBS, MMRL	Cryptococcus gattii	Rathrevor Beach, Parkville, British Columbia, Canada	North America	Retest of Douglas Fir #126 (hollow 2: 1/2)	Environmental	Kidd et al. Proc Natl Acad Science USA 2004;101:17258-17263	B	6A	alpha					1	1	1	1	1	1	H01	16	16	15	15	14	14	19	25	15	20	50	1	1	0	1	1	0	1	1	0	0	0	0	1	1	0	1
RB67	WM02.336	CBS, MMRL	Cryptococcus gattii	Rathrevor Beach, Parkville, British Columbia, Canada	North America	swab from Douglas Fir tree #130	Environmental	Kidd et al. Proc Natl Acad Science USA 2004;101:17258-17263	B	6B	alpha					2	2	2	2	2	4	H03	14	9.1	9	14	9.1	14	10	8	35	4	24	1	1	0	1	1	0	1	1	0	0	0	0	1	1	1	1
RDH2	JH3739; CBS11536, WM443	CBS, MMRL	Cryptococcus gattii	Northern Territory, Australia	Australasia	Human	Clinical	Sorrell et al. J. Clin. Microbiol 1996;34:1253-1260	B	6	alpha	1.60				28	9	25	1	17	44	H09	14	5	9	12	12.1	10	7	3	44	32	6	1	1	0	1	1	0	1	1	0	0	0	1	0	0	1	1
RDH6	WM04.70, RDH06, WM04.70 Brown, JH3743	CBS, MMRL	Cryptococcus gattii	Arnhemland, Northern Territory, Australia	Australasia	CSF from HIV negative human (y.o.i. November 1996)	Clinical	Chen et al. Clin Infect Dis 2000;31:499-508	B	6B	alpha					2	2	2	2	2	4	H03	14	9.1	9	14	9.1	14	10	8	35	4	24	1	1	0	1	1	0	1	1	0	0	0	0	1	1	1	1
RDH7	RDH7, JH3744; CBS11535, WM2607	CBS, MMRL	Cryptococcus gattii	Darwin, Northern Territory, Australia	Australasia	Human	Clinical	Campbell et al. Eukaryot Cell 2005;4:1410-1419	B	6	alpha					28	9	25	1	17	44	H09	14	5	9	12	12.1	10	7	3	37	20	3	1	1	0	1	1	0	1	1	1	0	0	1	0	0	1	1
RDH9	RDH9, JH3745; CBS11534, WM444	CBS, MMRL	Cryptococcus gattii	Darwin, Northern Territory, Australia	Australasia	Human	Clinical	Campbell et al. Eukaryot Cell 2005;4:1410-1419	B	6	alpha					28	9	25	1	17	44	H09	14	5	9	12	11.1	10	7	3	39	33	1	1	1	0	1	1	0	1	1	0	0	0	1	0	0	1	1
VPB571-015	WM03.312, McBride, WM05.312, M1	MMRL	Cryptococcus gattii	Cobbity, Sydney, New South Wales, Australia	Australasia	Isolated from a FIV- desexed Birmese cat (isolated 01-02-1990)	Veterinary	Sorrell et al. J. Clin. Microbiol. 1996;34:1253-1260	nd	6B	alpha					2	2	2	2	2	4	H03	14	9.1	9	14	9.1	14	10	8	35	4	24	1	1	0	1	1	0	1	1	0	0	0	0	1	1	1	1
VPB571-058	WM04.71, PR563, 571-058, V4, JH3631, V4/571_058	MMRL	Cryptococcus gattii	Chiswick, Sydney, New South Wales, Australia	Australasia	Pet cat (m.o.i. 9-10/1991)	Veterinary	Halliday et al., J Clin Microbiol 1999;37:2920-2926	nd	6B	alpha					2	2	2	2	2	4	H03	14	9.1	9	14	9.1	11	10	6	35	4	25	1	1	0	1	1	0	1	1	0	0	0	0	1	1	1	1
VPB571-073	WM2882, V9	MMRL	Cryptococcus gattii	Coogee, New South Wales, Australia	Australasia	Cat, isolated in 1992	Veterinary	Halliday et al., J Clin Microbiol 1999;37:2920-2926	B	6B	alpha					2	2	2	2	2	4	H03	14	9.1	9	14	9.1	14	10	8	35	4	24	1	1	0	1	1	0	1	1	0	0	0	0	1	1	1	1
VPB571-116	WM05.230, Webb/571116, 571116, V20	MMRL	Cryptococcus gattii	Camden, Sydney, Australia	Australasia	Dog, isolated in 1995	Veterinary	Campbell et al. Eukaryot Cell 2005;4:1403-1409	B	6B	alpha					2	2	2	2	2	4	H03	14	9.1	9	14	9.1	14	10	8	35	4	24	1	1	0	1	1	0	1	1	0	0	0	0	1	1	1	1
VPB571-271	Kimbe Madden, 571-271, M2, WM03.313	MMRL	Cryptococcus gattii	Cobbity, Sydney, New South Wales, Australia	Australasia	Isolated from nostril of a FIV- desexed Birmese cat (isolated 2003)	Veterinary	Kluger et al. Med Mycol 2006;44:561-566	nd	6B	alpha					2	2	2	2	2	4	H03	14	9.1	9	14	9.1	14	11	8	35	4	26	1	1	0	1	1	0	1	1	0	0	0	0	1	1	1	1
WA12	WM04.72	MMRL	Cryptococcus gattii	Western Australia, Australia	Australasia	Human	Clinical	Sorrell et al. J. Clin. Microbiol. 1996;34:1253-1260	nd	6B	alpha			Yes		2	2	2	2	2	4	H03	14	9.1	9	14	9.1	14	10	8	35	4	24	1	1	0	1	1	0	1	1	0	0	0	0	1	1	1	1
WA861	JH3622; CBS11539	CBS, MMRL	Cryptococcus gattii	Perth, Western Australia, Australia	Australasia	Dog (isolated April 1996)	Veterinary	Halliday et al., J Clin Microbiol 1999;37:2920-2926	B	6B	alpha					29	1	16	4	8	45	H03	12	6	13	12	11.1	8	10	12	24	16	16	1	1	0	1	1	0	1	1	0	0	0	1	0	0	1	0
WM1008		MMRL	Cryptococcus gattii	Mount Druitt, New South Wales, Australia	Australasia	Eucalyptus tereticornis, lavel frass	Environmental	Kidd et al. Med. Mycol 2003;41:171-176	B	6B	alpha					2	2	2	2	2	4	H03	14	9.1	9	14	9.1	15	10	8	35	4	29	1	1	0	1	1	0	1	1	0	0	0	0	1	1	1	1
WM148	CBS10085, W10	CBS, MMRL	C. neoformans var. grubii	Sydney, New South Wales, Australia	Australasia	CSF of HIV positive human (y.o.i. 1989)	Clinical	Meyer et al. Electrophoresis 1995;16:1648-1656	A	1	alpha					nd	nd	nd	nd	nd	nd	nd	n/a	n/a	n/a	n/a	n/a	n/a	n/a	n/a	n/a	n/a	n/a	1	1	0	0	0	0	0	0	0	0	0	0	0	0	0	0
WM161	CBS10081, 689,WM175, MYA-4562	CBS, MMRL	Cryptococcus gattii	San Diego, California, USA	North America	Tree hollow	Environmental	Meyer et al. Electrophoresis 1995;16:1648-1656	B	5	alpha					nd	nd	nd	nd	nd	nd	nd	n/a	n/a	n/a	n/a	n/a	n/a	n/a	n/a	n/a	n/a	n/a	1	1	0	0	0	0	1	1	0	0	0	1	0	0	1	0
WM178	IFM50894, CBS10082, MYA-4561, 49435, Colter	CBS, MMRL	Cryptococcus gattii	Sydney, New South Wales, Australia	Australasia	Lung of HIV negative human (y.o.i. 1991)	Clinical	Meyer et al. Electrophoresis 1995;16:1648-1656	B	6	alpha			Yes	Haploid	9	14	17	2	9	15	H23	13	7	11	12	11.1	13	11	8	5	10	19	1	1	0	1	1	0	1	1	0	0	0	0	1	1	1	1
WM179	CBS10078, MYA-4560, Byron	CBS, MMRL	Cryptococcus gattii	Sydney, New South Wales, Australia	Australasia	CSF of HIV negative human (y.o.i. 1993)	Clinical	Meyer et al. Electrophoresis 1995;16:1648-1656	B	4	alpha					nd	nd	nd	nd	nd	nd	nd	n/a	n/a	n/a	n/a	n/a	n/a	n/a	n/a	n/a	n/a	n/a	1	1	0	0	0	0	0	0	1	0	0	1	0	1	0	0
WM437		MMRL	Cryptococcus gattii	New Castle, New South Wales, Australia	Australasia	Human skin	Clinical	Meyer et al. Electrophoresis 1995;16:1648-1656	B	6B	alpha				Haploid	2	2	2	2	2	4	H03	15	9.1	9	14	9.1	14	10	8	36	4	27	1	1	0	1	1	0	1	1	0	0	0	0	1	1	1	1
WM626B	WM626 Brown, WM626, CBS10083, W20	CBS, MMRL	C. neoformans var. grubii	Sydney, New South Wales, Australia	Australasia	CSF of HIV negative human (d.o.i. August 1993)	Clinical	Meyer et al. Electrophoresis 1995;16:1648-1656	A	1B	alpha					nd	nd	nd	nd	nd	nd	nd	n/a	n/a	n/a	n/a	n/a	n/a	n/a	n/a	n/a	n/a	n/a	1	0	0	0	0	0	0	0	0	0	0	0	0	0	0	0
WM626W	WM626 White, WM626, CBS10084, W20	CBS, MMRL	C. neoformans var. grubii	Sydney, New South Wales, Australia	Australasia	CSF of HIV negative human (d.o.i. August 1993)	Clinical	Meyer et al. Electrophoresis 1995;16:1648-1656	A	1B	alpha					nd	nd	nd	nd	nd	nd	nd	n/a	n/a	n/a	n/a	n/a	n/a	n/a	n/a	n/a	n/a	n/a	1	0	0	0	0	0	0	0	0	0	0	0	0	0	0	0
WM628	CBS10080, 88B5400, Zapf	CBS, MMRL	C. neoformans var. neoformans	Melbourne, Australia	Australasia	CSF of HIV positive human (y.o.i. 1988)	Clinical	Meyer et al. Electrophoresis 1995;16:1648-1656	AD	3	a/alpha					nd	nd	nd	nd	nd	nd	nd	n/a	n/a	n/a	n/a	n/a	n/a	n/a	n/a	n/a	n/a	n/a	1	1	0	0	0	0	0	0	0	0	0	0	0	1	0	1
WM629	CBS10079, B87455, Borg	CBS, MMRL	C. neoformans var. neoformans	Melbourne, Australia	Australasia	Blood, Human	Clinical	Meyer et al. Electrophoresis 1995;16:1648-1656	D	2	alpha					nd	nd	nd	nd	nd	nd	nd	n/a	n/a	n/a	n/a	n/a	n/a	n/a	n/a	n/a	n/a	n/a	1	0	0	0	0	0	0	0	0	0	0	0	0	0	0	0
WM779	IFM50896, CBS10101, MYA-4563, King Cheetah	CBS, MMRL	Cryptococcus gattii	Johannesburg, South Africa	Africa	Cheetah (y.o.i. 1994/1995)	Veterinary	Bolton et al. J S Afr Vet Assoc 1999;70:35-39	C	7	alpha					nd	nd	nd	nd	nd	nd	nd	n/a	n/a	n/a	n/a	n/a	n/a	n/a	n/a	n/a	n/a	n/a	1	1	0	0	0	0	0	1	0	0	0	1	0	0	0	0
[truncated: 42 more columns]

## Sheet: Extended MLST Fraser et al 2005
Strain	CAP10	GPD1	IGS	LAC1	PLB1	TEF1	Assigned ST	Geographic origin	Reference to used MLST data
125	1	1	4	4	1	7	ST01	North America	S4
152	1	1	4	4	1	7	ST01	North America	S4
152A-3	1	1	4	4	1	7	ST01	North America	S4
AOR432	1	1	4	4	1	7	ST01	North America	S4
CBS6956	1	1	4	4	1	7	ST01	North America	S4
CBS7750	1	1	4	4	1	7	ST01	North America	S4
F2596	1	1	4	4	1	7	ST01	North America	S4
F2932	1	1	4	4	1	7	ST01	North America	S4
F3016	1	1	4	4	1	7	ST01	North America	S4
F3179	1	1	4	4	1	7	ST01	North America	S4
R265	1	1	4	4	1	7	ST01	North America	S4
R268	1	1	4	4	1	7	ST01	North America	S4
R269	1	1	4	4	1	7	ST01	North America	S4
R271	1	1	4	4	1	7	ST01	North America	S4
R376	1	1	4	4	1	7	ST01	North America	S4
R498	1	1	4	4	1	7	ST01	North America	S4
R540	1	1	4	4	1	7	ST01	North America	S4
RB1	1	1	4	4	1	7	ST01	North America	S4
RB2	1	1	4	4	1	7	ST01	North America	S4
RB39	1	1	4	4	1	7	ST01	North America	S4
RB4	1	1	4	4	1	7	ST01	North America	S4
RB45	1	1	4	4	1	7	ST01	North America	S4
RB59JF	1	1	4	4	1	7	ST01	North America	S4
ICB107	1	1	4	24	1	7	ST06	South America (Brazil)	S4
CBS6956B	1	1	4	4	1	7	ST01	North America	This study
CBS6956W	1	1	4	4	1	7	ST01	North America	This study
E758/2005	1	1	4	4	1	7	ST01	North America	This study
R265/25	1	1	4	4	1	7	ST01	North America	This study
RB59FH	1	1	4	4	1	7	ST01	North America	This study
RB59WM	1	1	4	4	1	7	ST01	North America	This study
IFM47258	1	1	4	4	1	7	ST01	South America (Brazil)	This study
MMRL1340	5	2	6	7	1	6	ST18	Australasia	S4
MMRL2647	5	2	6	7	1	6	ST18	Australasia	S4
NT-3	5	2	6	7	1	6	ST18	Australasia	S4
NT-8	5	2	6	7	1	6	ST18	Australasia	S4
RDH-2	5	2	6	7	1	6	ST18	Australasia	S4
RDH-7	5	2	6	7	1	6	ST18	Australasia	S4
RDH-9	5	2	6	7	1	6	ST18	Australasia	S4
Arn1	1	6	10	4	2	5	ST02	Australasia	S4
NT-12	1	6	10	4	2	5	ST02	Australasia	S4
NT-13	1	6	10	4	2	5	ST02	Australasia	S4
NT-6	1	6	10	4	2	5	ST02	Australasia	S4
NT-7	1	6	10	4	2	5	ST02	Australasia	S4
Ram15	1	6	10	4	2	5	ST02	Australasia	S4
Ram2	1	6	10	4	2	5	ST02	Australasia	S4
Ram5	1	6	10	4	2	5	ST02	Australasia	S4
RDH-6	1	6	10	4	2	5	ST02	Australasia	S4
V20/571_116	1	6	10	4	2	5	ST02	Australasia	S4
V21/571_118	1	6	10	4	2	5	ST02	Australasia	S4
V26/571_147	1	6	10	4	2	5	ST02	Australasia	S4
V4/571_058	1	6	10	4	2	5	ST02	Australasia	S4
V5/571_063	1	6	10	4	2	5	ST02	Australasia	S4
V9/571_073	1	6	10	4	2	5	ST02	Australasia	S4
R272	1	6	10	4	2	5	ST02	North America	S4
RB31	1	6	10	4	2	5	ST02	North America	S4
99/473	1	6	10	4	2	5	ST02	South America (Caribbean Islands)	S4
VPB571-058	1	6	10	4	2	5	ST02	Australasia	This study
R272S	1	6	10	4	2	5	ST02	North America	This study
R272W	1	6	10	4	2	5	ST02	North America	This study
ICB184	1	6	15	4	2	19	ST10	South America (Brazil)	S4
WA 861	10	16	15	4	9	7	ST19	Australasia	S4
LMM261	1	27	15	4	1	7	ST03	South America (Brazil)	This study
LMM551	1	27	15	4	2	19	ST10	South America (Brazil)	This study
LA57	1	27	15	4	2	19	ST10	South America (Brazil)	This study
LA61	1	27	15	4	2	19	ST10	South America (Brazil)	This study
HEC11102	17	27	15	25	18	19	ST22	South America (Brazil)	This study
HOO58-I-1543	18	27	15	4	16	7	ST26	South America (Colombia)	This study
EJB12	1	6	15	4	1	7	ST03	North America	S14
EJB14	1	6	15	4	1	7	ST03	North America	S14
EJB15	1	6	15	4	1	7	ST03	North America	S14
EJB18	1	6	15	4	1	7	ST03	North America	S14
A6M-R38	1	6	15	4	1	7	ST03	North America	S14
A6M-R41	1	6	15	4	1	7	ST03	North America	S14
WM178	1	17	16	16	14	5	ST20	Australasia	S4
ICB179	10	6	16	4	16	7	ST07	South America (Brazil)	S4
ICB180	10	6	16	4	16	7	ST07	South America (Brazil)	S4
LMM645	10	27	16	4	16	7	ST07	South America (Brazil)	This study
LMM892	10	27	16	4	16	7	ST07	South America (Brazil)	This study
LMM893	10	27	16	4	16	7	ST07	South America (Brazil)	This study
ICB182	1	6	21	21	2	20	ST08	South America (Brazil)	S4
2001/935-1	10	21	21	4	16	19	ST13	Africa	S4
2000/87	10	21	21	4	16	19	ST13	France clinical	S4
96/1120-1	10	21	21	4	16	19	ST13	France clinical	S4
96/1120-2	10	21	21	4	16	19	ST13	France clinical	S4
99/901-1	10	21	21	4	16	19	ST13	France clinical	S4
99/901-2	10	21	21	4	16	19	ST13	France clinical	S4
98/1132	1	6	22	4	2	7	ST16	South America (Caribbean Islands)	S4
2004/335	1	6	22	4	2	7	ST16	South America (French Guyana)	S4
2004/606	1	6	22	4	2	7	ST16	South America (French Guyana)	S4
2004/681	1	6	22	4	2	7	ST16	South America (French Guyana)	S4
CBS1930	1	6	25	4	18	7	ST04	South America (Aruba)	S4
ICB97	10	24	25	4	24	7	ST11	South America (Brazil)	S4
HOO58-I-0652	1	1	25	4	18	7	ST24	South America (Colombia)	This study
LMM547.18.3A3	1	16	25	4	25	5	ST33	South America (Brazil)	This study
HOO58-I-1388	1	27	25	4	18	7	ST04	South America (Colombia)	This study
HOO58-I-1391	1	27	25	4	18	7	ST04	South America (Colombia)	This study
HOO58-I-675	1	27	25	4	18	7	ST04	South America (Colombia)	This study
WM04.79	1	27	25	4	18	7	ST04	South America (Colombia)	This study
HOO58-I-675M	1	27	25	4	18	7	ST04	South America (Colombia)	This study
CBS8684	1	6	26	21	22	5	ST05	South America (Uruguay)	S4
2003/125	1	25	26	21	9	7	ST15	Europe	S4
98/1037-1	1	25	26	21	9	7	ST15	France clinical	S4
98/1037-2	1	25	26	21	9	7	ST15	France clinical	S4
LA338	1	22	26	4	26	7	ST31	South America (Brazil)	This study
CCA242	1	25	26	21	9	7	ST15	Europe	This study
LMM994	1	27	26	26	22	5	ST36	South America (Brazil)	This study
93/980	1	22	27	21	19	5	ST12	France clinical	S4
LMM566	1	22	27	21	26	7	ST34	South America (Brazil)	This study
LMM860	1	22	27	21	26	7	ST34	South America (Brazil)	This study
CG12022007S	1	27	27	4	2	7	ST21	South America (Brazil)	This study
CG12022007W	1	27	27	4	2	7	ST21	South America (Brazil)	This study
97/170	1	21	28	21	2	5	ST14	South America (French Guyana)	S4
2001/571	10	6	29	4	14	7	ST17	France clinical	S4
ICB183	14	21	30	4	18	7	ST09	South America (Brazil)	S4
LMM1003	16	27	31	21	27	7	ST29	South America (Brazil)	This study
AV54Slimy	19	16	31	4	2	5	ST37	Europe	This study
AV54White	19	16	31	4	2	5	ST37	Europe	This study
LMM265	10	27	32	4	16	7	ST30	South America (Brazil)	This study
LMM574.18.13A2	1	16	33	4	25	5	ST35	South America (Brazil)	This study
AV55	1	29	34	4	1	7	ST32	Europe	This study
LMM504	1	29	34	4	1	7	ST32	South America (Brazil)	This study
LA55	1	29	34	4	1	7	ST32	South America (Brazil)	This study
LA567	1	27	35	4	18	7	ST23	South America (Colombia)	This study
HOO58-I-762	14	21	36	4	18	7	ST25	South America (Colombia)	This study
LA362	10	27	37	4	16	7	ST28	South America (Brazil)	This study
LA337	10	28	38	4	16	19	ST27	South America (Brazil)	This study
